# Supplementary material
Source: MDPI journal article supplement (https://www.mdpi.com/2073-4352/7/3/92)
Supplement: s1 [file s1]

# Supplementary Materials: Two Organic Cation Salts Containing Tetra(isothiocyanate)cobaltate(II): Synthesis, Crystal Structures, Spectroscopic, Optical and Magnetic Properties

Zheng Zhang, Junwei Xu, Sisi Yan, Yangli Chen, Yan Wang, Zhuo Chen and Chunlin Ni

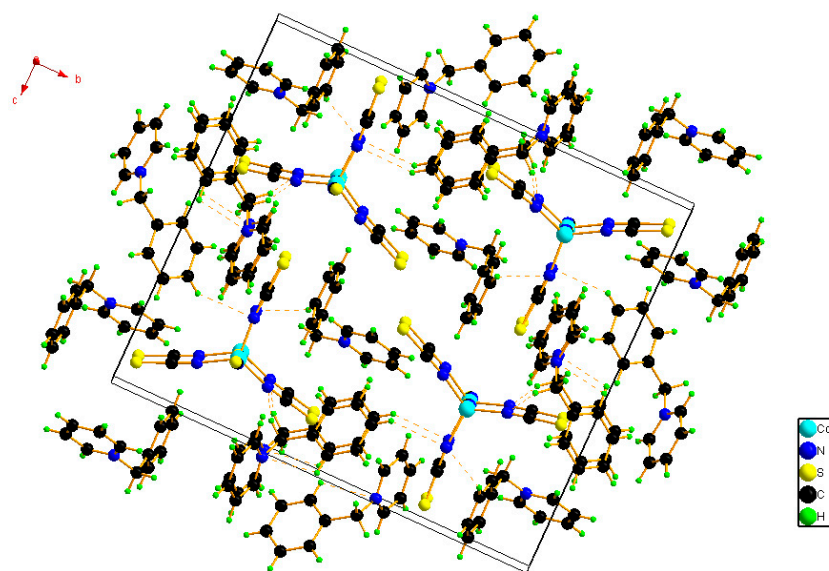

Figure S1. The packing diagram of 1 as viewed along *a*-axis.

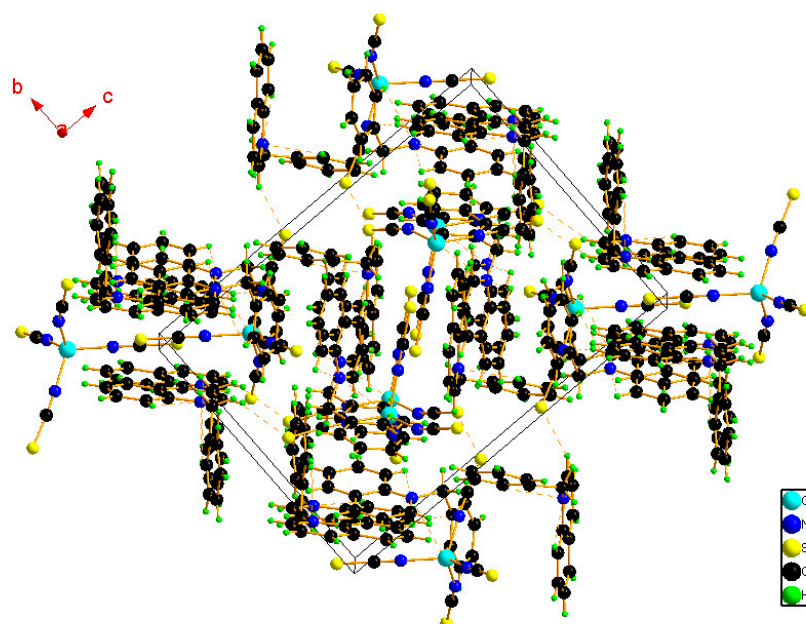

Figure S2. The packing diagram of 2 as viewed along *a*-axis..

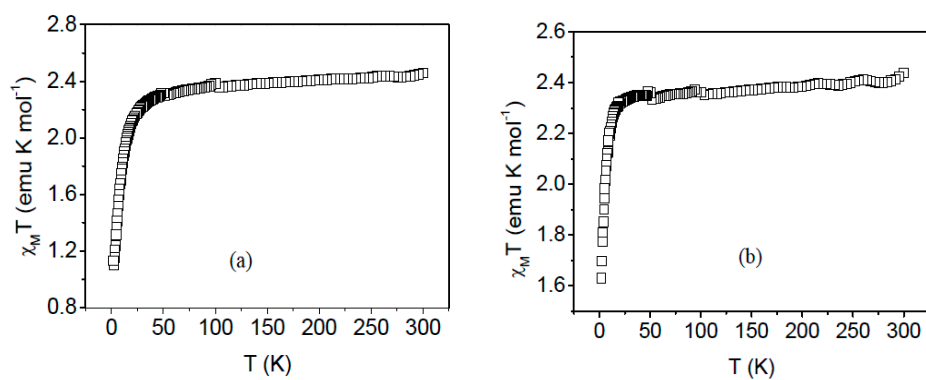

**Figure S3.** Plots of  $\chi_m T$  versus  $T$  for **1** (a) and **2** (b).
